# Supplementary material for: A Feedback Quenched Oscillator Produces Turing Patterning with One Diffuser
Source: PubMed Central journal article supplement (PMC3266880; doi:10.1371/journal.pcbi.1002331), 2012-01-26
Supplement: pcbi.1002331.s013.pdf [file pcbi.1002331.s013.pdf]

**Table S1:** Acceptable ranges and chosen parameter values for PDE and stochastic simulations.

| Parameter         | Range                                                                           | Value for PDE Simulation<br>(Parameter Set 1)                           | Value for Stochastic Simulation<br>(Parameter Set 2) |
|-------------------|---------------------------------------------------------------------------------|-------------------------------------------------------------------------|------------------------------------------------------|
| $\gamma_C$        | $\gamma_x \leq 1 \times 10^{-2} \text{ s}^{-1}$ [s12]                           | $2.89 \times 10^{-4} \text{ s}^{-1}$                                    | $2.89 \times 10^{-3} \text{ s}^{-1}$                 |
| $\gamma_T$        |                                                                                 | $2.89 \times 10^{-4} \text{ s}^{-1}$                                    | $2.89 \times 10^{-3} \text{ s}^{-1}$                 |
| $\gamma_L$        |                                                                                 | $2.89 \times 10^{-4} \text{ s}^{-1}$                                    | $2.89 \times 10^{-3} \text{ s}^{-1}$                 |
| $\gamma_I$        |                                                                                 | $1.16 \times 10^{-3} \text{ s}^{-1}$                                    | $2.89 \times 10^{-2} \text{ s}^{-1}$                 |
| $\gamma_A$        | $\gamma_A \sim 2 \times 10^{-3} \text{ s}^{-1}$ [s13]                           | $7.70 \times 10^{-4} \text{ s}^{-1}$                                    | $2.89 \times 10^{-2} \text{ s}^{-1}$                 |
| $\gamma_{mO}$     | $3.5 \times 10^{-4} \leq \gamma_m \leq 2.3 \times 10^{-2} \text{ s}^{-1}$ [s14] | $5.78 \times 10^{-4} \text{ s}^{-1}$                                    | $5.78 \times 10^{-3} \text{ s}^{-1}$                 |
| $\gamma_{mQ}$     |                                                                                 | $5.78 \times 10^{-3} \text{ s}^{-1}$                                    | $5.78 \times 10^{-2} \text{ s}^{-1}$                 |
| $V_{PLtetO-1}$    | $V_x \leq 4 \text{ s}^{-1}$ [s15]                                               | $0.3 \text{ s}^{-1}$ [s16]                                              | $4 \text{ s}^{-1}$                                   |
| $V_{PLlacO-1}$    |                                                                                 | $0.23 \text{ s}^{-1}$ [s16]                                             | $4 \text{ s}^{-1}$                                   |
| $V_{PR}$          |                                                                                 | $0.06 \text{ s}^{-1}$ [s17]                                             | $4 \text{ s}^{-1}$                                   |
| $V_{PLuxI}$       |                                                                                 | $0.26 \text{ s}^{-1}$ [s18]                                             | $4 \text{ s}^{-1}$                                   |
| $N_C$             | $1 \leq N_x \leq 30$                                                            | 5                                                                       | 4                                                    |
| $N_{TO}$          |                                                                                 | 5                                                                       | 4                                                    |
| $N_L$             |                                                                                 | 5                                                                       | 4                                                    |
| $N_I$             |                                                                                 | 5                                                                       | 4                                                    |
| $N_{TQ}$          |                                                                                 | 5                                                                       | 4                                                    |
| $C$               |                                                                                 | $1.5 \times 10^{-9} \text{ M}$ [s19]                                    | $1.5 \times 10^{-9} \text{ M}$                       |
| $K_C$             | $1 \times 10^{-13} \leq K_x \leq 1 \times 10^{-7} \text{ M}$ [s20, 21]          | $2.5 \times 10^{-8} \text{ M}$ [s21]                                    | $3 \times 10^{-9} \text{ M}$                         |
| $K_T$             |                                                                                 | $1.786 \times 10^{-10} \text{ M}$ [s22]                                 | $3 \times 10^{-9} \text{ M}$                         |
| $K_L$             |                                                                                 | $1 \times 10^{-13} \text{ M}$ [s20]                                     | $3 \times 10^{-9} \text{ M}$                         |
| $K_{RA}$          |                                                                                 | $1.5 \times 10^{-9} \text{ M}$ [s18]                                    | $6.75 \times 10^{-9} \text{ M}$                      |
| $n_C$             |                                                                                 | 2 [s21, 23]                                                             | 2                                                    |
| $n_T$             |                                                                                 | 2 [s23]                                                                 | 2                                                    |
| $n_L$             |                                                                                 | 2 [s23]                                                                 | 2                                                    |
| $n_{RA}$          |                                                                                 | 2 [s18]                                                                 | 2                                                    |
| $\ell_{PLtetO-1}$ |                                                                                 | 1/5050 [s16]                                                            | 1/1000                                               |
| $\ell_{PLlacO-1}$ |                                                                                 | 1/620 [s16]                                                             | 1/1000                                               |
| $\ell_{PR}$       |                                                                                 | 1/131 [s24]                                                             | 1/1000                                               |
| $\ell_{PLuxI}$    |                                                                                 | 1/167 [s18]                                                             | 1/1000                                               |
| $\epsilon_C$      | $\epsilon_x \leq 5.78 \times 10^{-3} \text{ s}^{-1}$ [s25]                      | $4.470 \times 10^{-4} \text{ s}^{-1}$                                   | $3.712 \times 10^{-4} \text{ s}^{-1}$                |
| $\epsilon_{TO}$   |                                                                                 | $2.269 \times 10^{-6} \text{ s}^{-1}$                                   | $1.856 \times 10^{-4} \text{ s}^{-1}$                |
| $\epsilon_L$      |                                                                                 | $2.113 \times 10^{-9} \text{ s}^{-1}$                                   | $3.712 \times 10^{-4} \text{ s}^{-1}$                |
| $\epsilon_I$      |                                                                                 | $2.655 \times 10^{-5} \text{ s}^{-1}$                                   | $3.815 \times 10^{-2} \text{ s}^{-1}$                |
| $\epsilon_{TQ}$   |                                                                                 | $6.224 \times 10^{-6} \text{ s}^{-1}$                                   | $1.856 \times 10^{-3} \text{ s}^{-1}$                |
| $v_3$             |                                                                                 | $0.01335 \text{ s}^{-1}$ [s26]                                          | $0.01 \text{ s}^{-1}$                                |
| $k_f$             | $1 \times 10^4 \leq k_f \leq 5 \times 10^9 \text{ M}$ [s27]                     | $1 \times 10^9 \text{ M}^{-1} \text{ s}^{-1}$ [s27]                     | $5 \times 10^9 \text{ M}^{-1} \text{ s}^{-1}$        |
| $k_r$             | $k_r \geq 5 \times 10^{-4} \text{ s}^{-1}$<br>(est. from [s18, 27, 28])         | $50 \text{ s}^{-1}$<br>(est. from [s18, 27, 28])                        | $15 \text{ s}^{-1}$                                  |
| $p_R$             |                                                                                 | $1 \times 10^{-8} \text{ M}$                                            | $1.8 \times 10^{-8} \text{ M}$                       |
| $d_{AHL}$         |                                                                                 | $1.667 \times 10^{-12} \text{ m}^2 \text{ s}^{-1}$<br>(est. from [s29]) | $1.667 \times 10^{-12} \text{ m}^2 \text{ s}^{-1}$   |

## References

- [s12] Lies M, Maurizi M (2008) Turnover of endogenous SsrA-tagged proteins mediated by ATP-dependent proteases in *Escherichia coli*. *Journal of Biological Chemistry* 283: 22918–22929.
- [s13] Danino T, Mondragón-Palomino O, Tsimring L, Hasty J (2010) A synchronized quorum of genetic clocks. *Nature* 463: 326–330.

- [s14] Rauhut R, Klug G (1999) mRNA degradation in bacteria. *FEMS microbiology reviews* 23: 353–370.
- [s15] Jia Y, Patel S (1997) Kinetic mechanism of transcription initiation by bacteriophage T7 RNA polymerase. *Biochemistry* 36: 4223–4232.
- [s16] Lutz R, Bujard H (1997) Independent and tight regulation of transcriptional units in *Escherichia coli* via the LacR/O, the TetR/O and AraC/I<sub>2</sub>-I<sub>2</sub> regulatory elements. *Nucleic acids research* 25: 1203.
- [s17] Potrykus K, Wegrzyn G, Hernandez V (2002) Multiple Mechanisms of Transcription Inhibition by ppGpp at the  $\lambda p_R$  Promoter. *Journal of Biological Chemistry* 277: 43785–43791.
- [s18] Canton B, Labno A, Endy D (2008) Refinement and standardization of synthetic biological parts and devices. *Nature biotechnology* 26: 787–793.
- [s19] Kubitschek H, Friske J (1986) Determination of bacterial cell volume with the Coulter Counter. *Journal of Bacteriology* 168: 1466–1467.
- [s20] Riggs A, Suzuki H, Bourgeois S (1970) lac repressor-operator interaction: I. Equilibrium studies. *Journal of Molecular Biology* 48: 67–83.
- [s21] Hawley D, Johnson A, McClure W (1985) Functional and physical characterization of transcription initiation complexes in the bacteriophage lambda OR region. *Journal of Biological Chemistry* 260: 8618–8626.
- [s22] Meier I, Wray L, Hillen W (1988) Differential regulation of the Tn10-encoded tetracycline resistance genes tetA and tetR by the tandem tet operators O1 and O2. *The EMBO journal* 7: 567–572.
- [s23] Bintu L, Buchler N, Garcia H, Gerland U, Hwa T, et al. (2005) Transcriptional regulation by the numbers: applications. *Current opinion in genetics & development* 15: 125–135.
- [s24] Dodd I, Shearwin K, Perkins A, Burr T, Hochschild A, et al. (2004) Cooperativity in long-range gene regulation by the  $\lambda$  CI repressor. *Genes & development* 18: 344–354.
- [s25] Kierzek A, Zaim J, Zielenkiewicz P (2001) The effect of transcription and translation initiation frequencies on the stochastic fluctuations in prokaryotic gene expression. *Journal of Biological Chemistry* 276: 8165–8172.
- [s26] Schaefer A, Val D, Hanzelka B, Cronan J, Greenberg E (1996) Generation of cell-to-cell signals in quorum sensing: acyl homoserine lactone synthase activity of a purified *Vibrio fischeri* LuxI protein. *Proceedings of the National Academy of Sciences of the United States of America* 93: 9505–9509.
- [s27] Zhou H (1997) Enhancement of protein-protein association rate by interaction potential: accuracy of prediction based on local Boltzmann factor. *Biophysical journal* 73: 2441–2445.
- [s28] Adar Y, Ulitzur S (1993) GroESL proteins facilitate binding of externally added inducer by LuxR protein-containing *E. coli* cells. *Journal of bioluminescence and chemiluminescence* 8: 261–266.
- [s29] Basu S, Gerchman Y, Collins C, Arnold F, Weiss R (2005) A synthetic multicellular system for programmed pattern formation. *Nature* 434: 1130–1134.
