# Supplementary material for: A Feedback Quenched Oscillator Produces Turing Patterning with One Diffuser
Source: PubMed Central journal article supplement (PMC3266880; doi:10.1371/journal.pcbi.1002331), 2012-01-26
Supplement: pcbi.1002331.s014.pdf [file pcbi.1002331.s014.pdf]

**Table S2:** Steady-state concentrations given by the analysis for the parameter sets in Table S1.

| <b>Species</b> | <b>Steady-state Concentration<br/>for PDE Simulation<br/>(Parameter Set 1)</b> | <b>Steady-state Concentration<br/>for Stochastic Simulation<br/>(Parameter Set 2)</b> |
|----------------|--------------------------------------------------------------------------------|---------------------------------------------------------------------------------------|
| $m_C$          | $5.478 \times 10^{-8} \text{ M}$                                               | $1.314 \times 10^{-7} \text{ M}$                                                      |
| $p_C$          | $8.474 \times 10^{-8} \text{ M}$                                               | $1.687 \times 10^{-8} \text{ M}$                                                      |
| $m_{TO}$       | $1.200 \times 10^{-7} \text{ M}$                                               | $1.314 \times 10^{-7} \text{ M}$                                                      |
| $p_T$          | $1.506 \times 10^{-9} \text{ M}$                                               | $1.687 \times 10^{-8} \text{ M}$                                                      |
| $m_L$          | $6.828 \times 10^{-8} \text{ M}$                                               | $1.314 \times 10^{-7} \text{ M}$                                                      |
| $p_L$          | $4.992 \times 10^{-13} \text{ M}$                                              | $1.687 \times 10^{-8} \text{ M}$                                                      |
| $m_I$          | $5.478 \times 10^{-9} \text{ M}$                                               | $1.314 \times 10^{-8} \text{ M}$                                                      |
| $p_I$          | $1.254 \times 10^{-11} \text{ M}$                                              | $1.734 \times 10^{-8} \text{ M}$                                                      |
| $A$            | $2.174 \times 10^{-9} \text{ M}$                                               | $6.000 \times 10^{-9} \text{ M}$                                                      |
| $p_{RA}$       | $4.166 \times 10^{-10} \text{ M}$                                              | $1.200 \times 10^{-8} \text{ M}$                                                      |
| $m_{TQ}$       | $2.619 \times 10^{-8} \text{ M}$                                               | $1.314 \times 10^{-8} \text{ M}$                                                      |
