# Supplementary material for: A Feedback Quenched Oscillator Produces Turing Patterning with One Diffuser
Source: PubMed Central journal article supplement (PMC3266880; doi:10.1371/journal.pcbi.1002331), 2012-01-26
Supplement: pcbi.1002331.s015.pdf [file pcbi.1002331.s015.pdf]

**Table S3:** Measurements of instability for spatial waves given by the analysis for the parameter sets in Table S1.

| <b>Instability Measurement</b>                                | <b>Value for PDE Simulation<br/>(Parameter Set 1)</b> | <b>Value for Stochastic Simulation<br/>(Parameter Set 2)</b> |
|---------------------------------------------------------------|-------------------------------------------------------|--------------------------------------------------------------|
| Instability threshold $d_{thresh}$                            | $9.5 \times 10^{-4}$                                  | $2.657 \times 10^{-2}$                                       |
| Maximum unstable wavelength                                   | 832.3 $\mu\text{m}$                                   | 49.77 $\mu\text{m}$                                          |
| Minimum unstable wave number $k$<br>for $L = 100\mu\text{m}$  | all are<br>unstable                                   | 5                                                            |
| Minimum unstable wave number $k$<br>for $L = 1000\mu\text{m}$ | 3                                                     | 41                                                           |
