# Supplementary material for: A Feedback Quenched Oscillator Produces Turing Patterning with One Diffuser
Source: PubMed Central journal article supplement (PMC3266880; doi:10.1371/journal.pcbi.1002331), 2012-01-26
Supplement: pcbi.1002331.s016.pdf [file pcbi.1002331.s016.pdf]

## Text S1 Analysis of quenched oscillator system for satisfying the three conditions for Turing instability

To obtain parameter constraints for Turing instability, we first linearize the reaction terms in (6)-(16) at the steady state  $(\bar{m}_C, \bar{p}_C, \bar{m}_{TO}, \bar{p}_T, \bar{m}_L, \bar{p}_L, \bar{m}_I, \bar{p}_I, \bar{A}, \bar{p}_{RA}, \bar{m}_{TQ})$  and obtain the Jacobian matrix:

$$J = \begin{bmatrix} -\gamma_{mO} & 0 & 0 & -b_4 & 0 & 0 & 0 & 0 & 0 & 0 & 0 \\ \epsilon_C & -\gamma_C & 0 & 0 & 0 & 0 & 0 & 0 & 0 & 0 & 0 \\ 0 & 0 & -\gamma_{mO} & 0 & 0 & -b_6 & 0 & 0 & 0 & 0 & 0 \\ 0 & 0 & \epsilon_{TO} & -\gamma_T & 0 & 0 & 0 & 0 & 0 & 0 & \epsilon_{TQ} \\ 0 & -b_2 & 0 & 0 & -\gamma_{mO} & 0 & 0 & 0 & 0 & 0 & 0 \\ 0 & 0 & 0 & 0 & \epsilon_L & -\gamma_L & 0 & 0 & 0 & 0 & 0 \\ \hline 0 & 0 & 0 & -b_{42} & 0 & 0 & -\gamma_{mQ} & 0 & 0 & 0 & 0 \\ 0 & 0 & 0 & 0 & 0 & 0 & \epsilon_I & -\gamma_I & 0 & 0 & 0 \\ 0 & 0 & 0 & 0 & 0 & 0 & 0 & v_3 & -a_9 & a_{10} & 0 \\ 0 & 0 & 0 & 0 & 0 & 0 & 0 & 0 & c_9 & -a_{10} & 0 \\ 0 & 0 & 0 & 0 & 0 & 0 & 0 & 0 & 0 & b_{10} & -\gamma_{mQ} \end{bmatrix},$$

where we use the parameters  $\alpha_C = \bar{p}_C/K_C$ ,  $\alpha_T = \bar{p}_T/K_T$ ,  $\alpha_L = \bar{p}_L/K_L$ , and  $\alpha_A = \bar{A}/K_A$  to obtain the off-diagonal entries:

$$\begin{aligned} c_9 &= \frac{k_f p_R}{1 + \alpha_A}, \\ a_9 &= c_9 + \gamma_A, \\ a_{10} &= k_r(1 + \alpha_A), \\ b_2 &= V_{P_R} V_L C \frac{n_C \alpha_C^{(n_C-1)}}{K_C(1 + \alpha_C^{n_C})^2}, \\ b_4 &= V_{P_{LtetO-1}} N_C C \frac{n_T \alpha_T^{(n_T-1)}}{K_T(1 + \alpha_T^{n_T})^2}, \\ b_{42} &= V_{P_{LtetO-1}} N_I C \frac{n_T \alpha_T^{(n_T-1)}}{K_T(1 + \alpha_T^{n_T})^2}, \\ b_6 &= V_{P_{LlacO-1}} N_{TO} C \frac{n_L \alpha_L^{(n_L-1)}}{K_L(1 + \alpha_L^{n_L})^2}, \\ b_{10} &= V_{P_{LuxI}} N_{TQ} C \frac{n_{RA} (\frac{K_{RA}}{p_R}) (\frac{K_{RA}}{p_R} \frac{1 + \alpha_A}{\alpha_A})^{n_{RA}}}{p_R (1 + (\frac{K_{RA}}{p_R} \frac{1 + \alpha_A}{\alpha_A})^{n_{RA}})^2}. \end{aligned}$$

$J_{osc}$  is the  $6 \times 6$  principal submatrix of  $J$ , which corresponds to the first loop – the standard repressilator system (*cI-lacI-tetR*). AHL is the only diffusible species, so  $D = \text{diag}\{0, 0, 0, 0, 0, 0, 0, 0, 0, d_{AHL}, 0, 0\}$ .

**Condition 1:** The oscillator loop by itself would produce oscillations ( $J_{osc}$  is unstable).

The eigenvalues of  $J_{osc}$  are the roots of:

$$\det(\lambda I - J_{osc}) = (\lambda + \gamma_{mO})^3 (\lambda + \gamma_p)^3 + \epsilon_C \epsilon_{TO} \epsilon_L b_2 b_4 b_6. \quad (\text{S.1})$$

It can be shown [s9] that instability of  $J_{osc}$  is achieved when:

$$\frac{(\beta + 1)^2}{\beta} < \frac{3X^2}{4 + 2X} \quad (\text{S.2})$$

where  $\beta = \gamma_p/\gamma_{mO}$  and  $X = -\frac{1}{\gamma_p \gamma_{mO}} \sqrt[3]{\epsilon_C \epsilon_{TO} \epsilon_L b_2 b_4 b_6}$ . Substituting steady-state expressions and rearranging, we arrive at the following expression for  $X$ :

$$\begin{aligned} X^3 &= -n_C n_T n_L \frac{\alpha_{RA}}{1 + \alpha_{RA}} \frac{\alpha_C^{n_C}}{1 + \alpha_C^{n_C}} \frac{1}{1 + \ell_{P_R} (1 + \alpha_C^{n_C})} \frac{\alpha_T^{n_T}}{1 + \alpha_T^{n_T}} \frac{1}{1 + \ell_{P_{LtetO-1}} (1 + \alpha_T^{n_T})} \\ &\times \frac{\alpha_L^{n_L}}{1 + \alpha_L^{n_L}} \frac{1}{1 + \ell_{P_{LlacO-1}} (1 + \alpha_L^{n_L})}, \end{aligned} \quad (\text{S.3})$$

where the additional variable  $\alpha_{RA} \geq 0$  is defined by the relation:

$$\frac{1}{1 + \alpha_{RA}} = \frac{\epsilon_{TQ} V_{P_{LuxI}} N_{TQ} C}{\gamma_p \gamma_{mQ} \alpha_T K_T} \left( \frac{1}{1 + (\frac{K_{RA}}{p_R} \frac{1 + \alpha_A}{\alpha_A})^{n_{RA}}} + \ell_{P_{LuxI}} \right).$$

**Condition 2:** The quenching loop ceases oscillations in the full system ( $J$  is stable).

The eigenvalues of  $J$  are the roots of:

$$\det(\lambda I - J) = \det(\lambda I - J_{osc})(\lambda + \gamma_I)(\lambda + \gamma_m Q)^2[(\lambda + a_9)(\lambda + a_{10}) - c_9 a_{10}] + F(\lambda + \gamma_m O)^3(\lambda + \gamma_p)^2, \quad (\text{S.4})$$

where  $F = v_3 \epsilon_I \epsilon_{TQ} c_9 b_{42} b_{10}$  characterizes the feedback strength. To quench the oscillatory modes of  $J_{osc}$ ,  $F$  must be a value such that all of the eigenvalues of  $J$  have negative real part. Substituting steady-state expressions and rearranging, we arrive at the following expression for  $F$ :

$$F = \gamma_T \gamma_I \gamma_A \gamma_m^2 Q^2 k_r n_T n_{RA} \frac{1}{1 + \alpha_{RA}} \frac{\left(\frac{K_{RA}}{p_R} \frac{1 + \alpha_A}{\alpha_A}\right)^{n_{RA}}}{1 + \left(\frac{K_{RA}}{p_R} \frac{1 + \alpha_A}{\alpha_A}\right)^{n_{RA}}} \frac{1}{1 + \ell_{P_{LuxI}} \left(1 + \left(\frac{K_{RA}}{p_R} \frac{1 + \alpha_A}{\alpha_A}\right)^{n_{RA}}\right)} \times \frac{\alpha_T^{n_T}}{1 + \alpha_T^{n_T}} \frac{1}{1 + \ell_{P_{tetO-1}} (1 + \alpha_T^{n_T})}. \quad (\text{S.5})$$

**Condition 3:** Diffusion will weaken the quenching loop's influence on the oscillator loop for high wave numbers, allowing spatio-temporal oscillations to emerge ( $J + \lambda_k D$  is unstable for some  $k \geq 1$ ).

For  $\Omega = [0, L]$ ,  $\lambda_k = -(k\pi/L)^2$  for eigenfunctions  $\cos(\frac{k\pi}{L}x)$ .  $J + \lambda_k D$  looks identical to  $J$  except for the AHL entry of the diagonal, which is now defined as  $-\hat{a}_9 = -c_9 - \gamma_A + \lambda_k d_{AHL}$ . This leads to:

$$\det(\lambda I - (J + \lambda_k D)) = \det(\lambda I - J_{osc})(\lambda + \gamma_I)(\lambda + \gamma_m Q)^2[(\lambda + \hat{a}_9)(\lambda + a_{10}) - c_9 a_{10}] + F(\lambda + \gamma_m O)^3(\lambda + \gamma_p)^2, \quad (\text{S.6})$$

which yields unstable roots for large enough  $\lambda_k d_{AHL}$ . This implies that, for diffusion-driven patterning, we need a large diffusion coefficient, a large wave number, or a small spatial domain. Let  $d_{thresh}$  be the instability threshold for a particular set of parameters, that is, (S.6) becomes unstable when:

$$(k\pi/L)^2 d_{AHL} > d_{thresh}.$$

This expression can be rewritten in terms of the spatial wavelength  $\omega_x$  as:

$$\omega_x^2 < 4\pi^2 d_{AHL} / d_{thresh}.$$

This maximum unstable wavelength is a convenient formulation because it applies to any chosen spatial domain size.

## References

[s1] Elowitz M, Leibler S (2000) A synthetic oscillatory network of transcriptional regulators. Nature 403: 335–338.
