# Supplementary material for: A Feedback Quenched Oscillator Produces Turing Patterning with One Diffuser
Source: PLOS journal article supplement (doi:10.1371/journal.pcbi.1002331), 2012-01-26
Supplement: S20 (10.1371/journal.pcbi.1002331.s020) [file journal.pcbi.1002331.s020]

301 Moved Permanently

# Moved Permanently

The document has moved here.

---

Apache Server at www.ploscompbiol.org Port 80
